## Cardiopulmonary resuscitation training in spanish schools: when first link is not well recognized

Jorge Perez P.<sup>1</sup>; Baneras-Rius J.<sup>2</sup>; Martin-Cabeza MM.<sup>1</sup>; Barrionuevo-Sanchez MI.<sup>3</sup>; Lukic-Otanovic A.<sup>4</sup>; Loma-Osorio-Rincon P.<sup>5</sup>; Belmonte-Vico R.<sup>2</sup>; Rodenas-Alsina E.<sup>2</sup>; Anguita-Sanchez M.<sup>6</sup>

<sup>1</sup>University Hospital of the Canaries, Santa Cruz de Tenerife, Spain

<sup>2</sup>University Hospital Vall d'Hebron, Barcelona, Spain

<sup>3</sup>Hospital Universitari de Bellvitge, Barcelona, Spain

<sup>4</sup>Clinical University Hospital Lozano Blesa, Zaragoza, Spain

<sup>5</sup>University Hospital de Girona Dr. Josep Trueta, Girona, Spain

<sup>6</sup>GENERAL HOSPITAL OF H.U. REINA SOFIA, Cordoba, Spain

**Funding Acknowledgements:** Type of funding sources: None.

**OnBehalf:** Cardiopulmonar resuscitation working group of the Spanish Society of Cardiology

**Background:** First aid teaching is mandatory in Spanish schools, but there is a variability in how training is performed within different regions of the country. We aimed to study the degree of implementation of school cardiopulmonary resuscitation (CPR) training in Spain.

**Methods:** A nationwide cross-sectional survey was carried out from February to December 2019. A self-administered questionnaire was carried out aimed at school children. The association between school children characteristics (sex, age and previous CPR education training) and CPR knowledge was evaluated.

**Results:** A total of 5892 valid school children surveys were collected. Regarding to school children, mean age was 14.67 years and 36,2% of them had received CPR training, with similar distribution by sex and with an increase in higher courses (28.7% <13 years, 33.9% 13-16 years, 54.9% >16 years; p = 0.002). At older all CPR knowledge improves, except the telephone emergency number. Comparing school children who had or not received previous CPR training, there was no difference in correctly identifying the emergency telephone number (p = 0.169) or OHCA (p = 0.05), but school children (32.4% vs 29%, p = 0.005) who have not received the training better recognize the telephone number.

**Conclusions:** the implementation of CPR training programs is insufficient in spanish schools and they also do not work to remember the emergency number. Urgent action is required to improve the first link of the survival-chain by disseminating the emergency telephone number.

Table 1 – Students surveys main results

| Variables                        | N                 | %    |
|----------------------------------|-------------------|------|
| Autonomous communities responses | 53                | 0.9  |
| Castile la Mancha                | 213               | 3.6  |
| Valencia                         | 6                 | 0.1  |
| Andalucía                        | 41                | 0.7  |
| Castile Leon                     | 81                | 1.4  |
| Extremadura                      | 3823              | 64.9 |
| Catalonia                        | 357               | 6.1  |
| Aragon                           | 47                | 0.8  |
| Madrid                           | 6                 | 0.1  |
| Navarra                          | 1263              | 21.4 |
| Canary Islands                   |                   |      |
| Mean age (years)                 | 14.67 (± SD 1.92) |      |
| Age distribution                 | 830               | 14.2 |
| < 13 years                       | 4164              | 71.4 |
| 13 - 16 years                    | 843               | 14.4 |
| > 16 years                       |                   |      |
| Female                           | 2927              | 50.1 |

| Variables                           | N    | %    |
|-------------------------------------|------|------|
| CA knowledge                        | 1836 | 31.2 |
| Emergency number                    | 379  | 6.4  |
| 061 or 112                          | 3675 | 62.4 |
| Hospital or police number           | 452  | 7.7  |
| Other or unknown                    | 2472 | 42.2 |
| CPR identification                  | 2748 | 46.9 |
| Unconscious                         | 188  | 3.2  |
| Unconscious not breathing           |      |      |
| Unconscious not breathing, no pulse |      |      |
| Others                              |      |      |
| CPR experience                      | 504  | 8.6  |
| Witnessing CA                       |      |      |
| CPR teaching                        | 4086 | 69.6 |
| Hearing about CA                    | 2107 | 36.2 |
| CPR training                        | 4077 | 70.1 |
| Hearing about AED                   | 2048 | 35.3 |
| Closest AED knowledge               |      |      |
